# Supplementary material for: Detection of Fungi and Oomycetes by Volatiles Using E-Nose and SPME-GC/MS Platforms
Source: PubMed Central journal article supplement (PMC7730677; doi:10.3390/molecules25235749), 2020-12-05
Supplement: molecules-25-05749-s001.pdf [file molecules-25-05749-s001.pdf]

Article

# Detection of Fungi and Oomycetes by Volatiles Using E-Nose And SPME-GC/MS Platforms

J r mie Loulier <sup>1</sup>, Fran ois Lefort <sup>1,\*</sup>, Marcin Stocki <sup>2</sup>, Monika Asztemborska <sup>3</sup>, Rafa  Szmigielski <sup>3</sup>, Krzysztof Siwek <sup>4</sup>, Tomasz Grzywacz <sup>4</sup>, Tom Hsiang <sup>5</sup>, S awomir S lusarski <sup>6</sup>, Tomasz Oszako <sup>2,6</sup>, Marcin Klisz <sup>7</sup>, Rafa  Tarakowski <sup>8</sup> and Justyna Anna Nowakowska <sup>9,\*</sup>

- <sup>1</sup> InTNE (Plants & Pathogens Group), hepia, University of Applied Sciences and Arts of Western Switzerland, 150 route de Presinge, 1254 Jussy, Switzerland; jeremie.loulier@bluewin.ch
- <sup>2</sup> Institute of Forest Sciences, Faculty of Civil Engineering and Environmental Sciences, Bialystok University of Technology, Wiejska 45E, 15–351 Bialystok, Poland; m.stocki@pb.edu.pl (M.S.); T.Oszako@ibles.waw.pl (T.O.)
- <sup>3</sup> Institute of Physical Chemistry, Polish Academy of Sciences, Kasprzaka 44/52, 01–224 Warsaw, Poland; monika@ichf.edu.pl (M.A.); ralf@ichf.edu.pl (R.S.)
- <sup>4</sup> Faculty of Electrical Engineering, Warsaw University of Technology, Koszykowa 75, 00–661 Warsaw, Poland; krzysztof.siwek@ee.pw.edu.pl (K.S.); tomasz.grzywacz@ee.pw.edu.pl (T.G.)
- <sup>5</sup> Environmental Sciences, University of Guelph, Guelph, Ontario N1G 2W1, Canada; thsiang@uoguelph.ca
- <sup>6</sup> Forest Protection Department, Forest Research Institute, Braci Le nej 3, 05–090 S kocin Stary, Poland; S.Slusarski@ibles.waw.pl
- <sup>7</sup> Department of Silviculture and Genetics, Forest Research Institute, Braci Le nej 3, 05–090 S kocin Stary, Poland; M.Klisz@ibles.waw.pl
- <sup>8</sup> Faculty of Physics, Warsaw University of Technology, Koszykowa 75, 00–662 Warsaw, Poland; Rafal.Tarakowski@pw.edu.pl
- <sup>9</sup> Institute of Biological Sciences, Cardinal Stefan Wyszyński University in Warsaw, W ycickiego 1/3 Street, 01–938 Warsaw, Poland
- \* Correspondence: francois.lefort@hesge.ch (F.L.); j.nowakowska@uksw.edu.pl (J.A.N.); Tel.: +41-22-546-68-27 (F.L.); Tel. +48-22-569-6838 (J.A.N.)

## Supplementary files:

**Table 1.** Composition of the sensor arrays used for e-nose sample detection tests. 1-8: Tagoshima gas sensors were purchased from Figaro Engineering Inc. (Osaka, Japan); 9-10: Relative humidity and temperature sensors were manufactured by Honeywell (Morristowne, New Jersey, USA) and Texas Instruments (Dallas, Texas, USA), respectively.

| Sensor | Model                     | Sensitivity Range                                                                                                                                                                                              |
|--------|---------------------------|----------------------------------------------------------------------------------------------------------------------------------------------------------------------------------------------------------------|
| 1      | TGS2600-B00 <sup>1)</sup> | Air contaminants such as hydrogen, ethanol, carbon monoxide, etc.                                                                                                                                              |
| 2      | TGS2610-C00               | Smaller than TGS2610-D00, this sensor quickly reacts to liquefied petroleum gases (LPG) like propane, butane, etc.                                                                                             |
| 3      | TGS2610-D00               | Bigger than TGS2610-C00, this sensor includes a filter material preventing gases such as ethanol to interfere with the detection process, thus increasing its selectivity towards LPG (propane, butane, etc.). |
| 4      | TGS2611-C00               | Smaller than TGS2611-E00, this sensor quickly reacts to methane.                                                                                                                                               |
| 5      | TGS2611-E00               | Bigger than TGS2611-C00, this sensor includes a filter material preventing gases such as ethanol to interfere with the detection process, thus increasing its selectivity towards methane.                     |
| 6      | TGS2612-D00 <sup>1)</sup> | Methane, propane, iso-butane                                                                                                                                                                                   |

---

|    |                           |                                                                                                                                           |
|----|---------------------------|-------------------------------------------------------------------------------------------------------------------------------------------|
| 7  | TGS2620-C00 <sup>1)</sup> | Alcohol, solvent vapors                                                                                                                   |
| 8  | TGS2602-C00 <sup>1)</sup> | Ammonia and hydrogen sulphide                                                                                                             |
| 9  | HHH-3610-002              | Relative humidity sensor consisting of a trimmed thermoset polymer capacitive sensing element with on-chip integrated signal conditioning |
| 10 | LM35DH                    | Precision integrated-circuit temperature device with an output voltage linearly proportional to Centigrade temperature                    |

---

<sup>1)</sup> sensors for detection of relative humidity and ambient temperature

**Table 2.** Pearson’s correlation coefficients between variables and the first two major components, and contribution of variables in principal components and variation explained.

| Variables          | Pearson’s correlation |       | Contribution in PCs [%] |       |
|--------------------|-----------------------|-------|-------------------------|-------|
|                    | PC1                   | PC2   | PC1                     | PC2   |
| SEN_1              | 0.99                  | -0.03 | 8.78                    | 0.19  |
| SEN_2              | 1.00                  | -0.03 | 8.81                    | 0.19  |
| SEN_3              | 0.97                  | -0.17 | 8.38                    | 7.23  |
| SEN_4              | 0.92                  | -0.31 | 7.51                    | 24.81 |
| SEN_5              | 0.99                  | -0.04 | 8.69                    | 0.48  |
| SEN_6              | 0.98                  | 0.00  | 8.58                    | 0.00  |
| SEN_7              | 0.97                  | -0.01 | 8.32                    | 0.03  |
| SEN_8              | 0.84                  | 0.49  | 6.23                    | 61.76 |
| SEN_9              | 0.98                  | 0.1   | 8.56                    | 2.74  |
| SEN_10             | 0.99                  | 0.09  | 8.63                    | 2.25  |
| SEN_11             | 0.99                  | -0.02 | 8.77                    | 0.12  |
| SEN_12             | 0.99                  | -0.03 | 8.74                    | 0.21  |
| Variance explained |                       |       | 93.87                   | 03.26 |

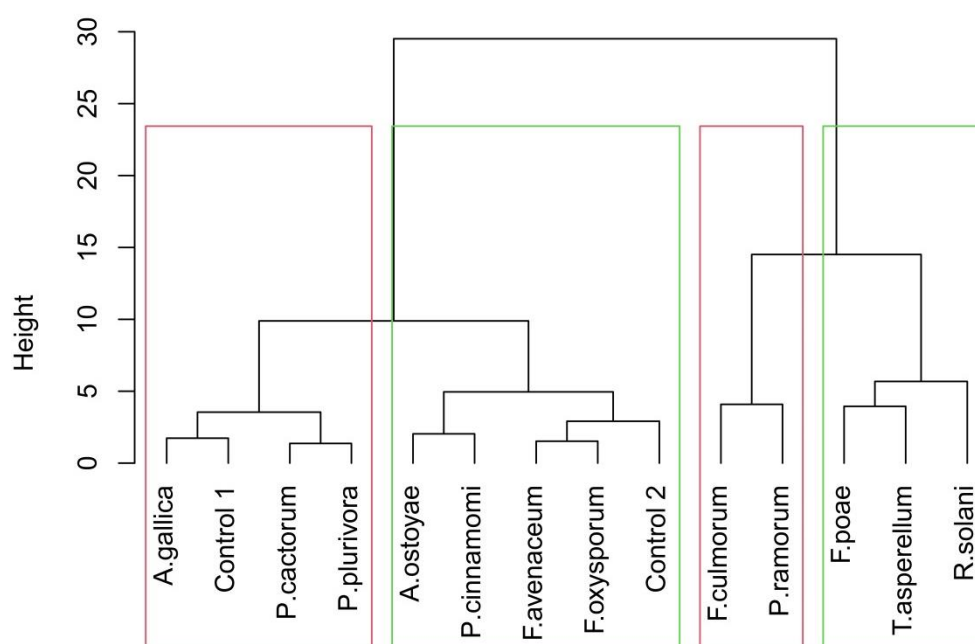

**Figure 1.** Hierarchical clustering of the microorganism-induced sensor signals based on Euclidean distance and Ward’s minimum variance clustering method. The groups of similarities were clustered. Control 1 - Empty flask; Control 2 - PDA medium.
